# Supplementary material
Source: PubMed Central journal article supplement (PMC1914169)
Supplement: plntphys_pp.107.097691_1.pdf [file plntphys_pp.107.097691_1.pdf]

## Supplemental Table S1

**Supplemental Table S1.** *Salicylic acid levels in pbs3 mutants normalized to Col-0 in pathogen infected leaves.*

Free SA and SAG in  $\mu\text{g/g}$  fresh weight normalized to Col-0 24 hpi with *Pst avrRpt2* at  $\text{OD}_{600}$  0.0001 for three independent experiments each done in triplicate. SA and SAG levels were calculated based on the average percent recovery of an internal *o*-anisic acid standard for each experiment.

|         |               | Exp 1 | Exp 2 | Exp 3 | Avg  | SD   |
|---------|---------------|-------|-------|-------|------|------|
| Free SA | <i>pbs3-1</i> | 1.99  | 1.76  | 2.55  | 2.10 | 0.41 |
| Free SA | <i>pbs3-2</i> | 1.42  | 2.05  | 2.44  | 1.96 | 0.51 |
| SAG     | <i>pbs3-1</i> | 0.15  | 0.18  | 0.35  | 0.23 | 0.12 |
| SAG     | <i>pbs3-2</i> | 0.07  | 0.10  | 0.22  | 0.13 | 0.07 |

## Supplemental Table S2

| <b>Supplemental Table S2. Primers used for qRT-PCR</b> |                                     |                                                                                              |                     |
|--------------------------------------------------------|-------------------------------------|----------------------------------------------------------------------------------------------|---------------------|
| <b>AGI #</b>                                           | <b>Gene Name</b>                    | <b>Primer sequences</b>                                                                      | <b>Product size</b> |
| At5g19770                                              | <i>TUA3</i><br>( $\alpha$ -tubulin) | Forward:<br>5' GTA TTG AAC GCA TCG TGT G 3'<br>Reverse:<br>5' TGG GAG CTT TAC TGT CTC GAA 3' | 92 bp               |
| At2g14610                                              | <i>PR1</i>                          | Forward:<br>5' CAT GGG ACC TAC GCC TAC C 3'<br>Reverse:<br>5' TTC TTC CCT CGA AAG CTC AA 3'  | 86 bp               |

Supplemental Figure 1

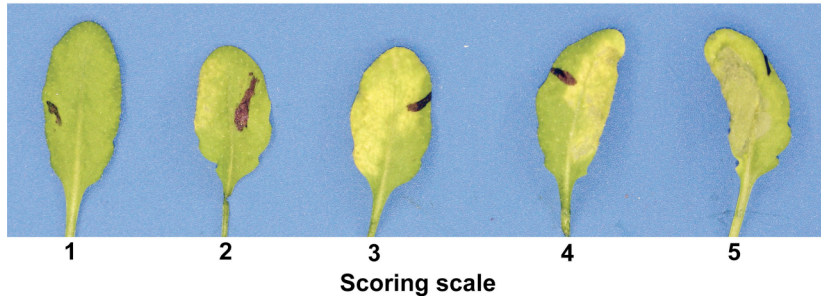

Supplemental Figure 2

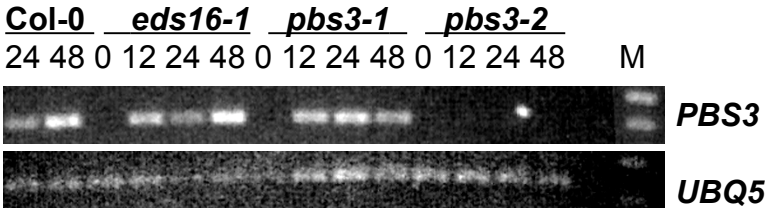

# Supplemental Figure 3

|     | Motif I                                                                                                                         | Group           |                 |
|-----|---------------------------------------------------------------------------------------------------------------------------------|-----------------|-----------------|
| 15  | KKDLTSNKKSTQDNLEELITPNKTEYLORFLIDRFKELFKKNVPLVSYEDIKPYLRVNGVSDVTSARITGFLVSSGTSGGAKMPWNNKYLDNLTFLYVLRVH                          | III             |                 |
| 16  | LEDLTSNKKSTQDNLEELITPNKTEYLORFLIDRFKELFKKNVPLVSYEDIKPYLRVNGVSDVTSARITGFLVSSGTSGGAKMPWNNKYLDNLTFLYVLRVH                          |                 | At5g13320. P5B3 |
| 17  | LEDLTSNKKSTQDNLEELITPNKTEYLORFLIDRFKELFKKNVPLVSYEDIKPYLRVNGVSDVTSARITGFLVSSGTSGGAKMPWNNKYLDNLTFLYVLRVH                          |                 | At1g23160       |
| 18  | LEDLTSNKKSTQDNLEELITPNKTEYLORFLIDRFKELFKKNVPLVSYEDIKPYLRVNGVSDVTSARITGFLVSSGTSGGAKMPWNNKYLDNLTFLYVLRVH                          |                 | At5g51470       |
| 11  | LEELTSNAKQDNLEELITPNKTEYLORFLIDRFKELFKKNVPLVSYEDIKPYLRVNGVSDVTSARITGFLVSSGTSGGAKMPWNNKYLDNLTFLYVLRVH                            |                 | At1g48670       |
| 10  | LEVLTSNAKQDNLEELITPNKTEYLORFLIDRFKELFKKNVPLVSYEDIKPYLRVNGVSDVTSARITGFLVSSGTSGGAKMPWNNKYLDNLTFLYVLRVH                            |                 | At1g48660       |
| 17  | LEDLTSNKKSTQDNLEELITPNKTEYLORFLIDRFKELFKKNVPLVSYEDIKPYLRVNGVSDVTSARITGFLVSSGTSGGAKMPWNNKYLDNLTFLYVLRVH                          |                 | At5g13360       |
| 17  | LEDLTSNKKSTQDNLEELITPNKTEYLORFLIDRFKELFKKNVPLVSYEDIKPYLRVNGVSDVTSARITGFLVSSGTSGGAKMPWNNKYLDNLTFLYVLRVH                          |                 | At5g13370       |
| 17  | LEDLTSNKKSTQDNLEELITPNKTEYLORFLIDRFKELFKKNVPLVSYEDIKPYLRVNGVSDVTSARITGFLVSSGTSGGAKMPWNNKYLDNLTFLYVLRVH                          |                 | At5g13380       |
| 47  | LEDLTSNKKSTQDNLEELITPNKTEYLORFLIDRFKELFKKNVPLVSYEDIKPYLRVNGVSDVTSARITGFLVSSGTSGGAKMPWNNKYLDNLTFLYVLRVH                          |                 | At5g13350       |
| 17  | LEDLTSNKKSTQDNLEELITPNKTEYLORFLIDRFKELFKKNVPLVSYEDIKPYLRVNGVSDVTSARITGFLVSSGTSGGAKMPWNNKYLDNLTFLYVLRVH                          |                 | At1g28130       |
| 28  | LEDLTSNKKSTQDNLEELITPNKTEYLORFLIDRFKELFKKNVPLVSYEDIKPYLRVNGVSDVTSARITGFLVSSGTSGGAKMPWNNKYLDNLTFLYVLRVH                          |                 | At5g54510. DFL1 |
| 28  | LEDLTSNKKSTQDNLEELITPNKTEYLORFLIDRFKELFKKNVPLVSYEDIKPYLRVNGVSDVTSARITGFLVSSGTSGGAKMPWNNKYLDNLTFLYVLRVH                          |                 | At4g27260       |
| 27  | LEDLTSNKKSTQDNLEELITPNKTEYLORFLIDRFKELFKKNVPLVSYEDIKPYLRVNGVSDVTSARITGFLVSSGTSGGAKMPWNNKYLDNLTFLYVLRVH                          |                 | At4g37390. YDK1 |
| 15  | LEELTSNAKQDNLEELITPNKTEYLORFLIDRFKELFKKNVPLVSYEDIKPYLRVNGVSDVTSARITGFLVSSGTSGGAKMPWNNKYLDNLTFLYVLRVH                            |                 | At2g47750       |
| 26  | LEDLTSNKKSTQDNLEELITPNKTEYLORFLIDRFKELFKKNVPLVSYEDIKPYLRVNGVSDVTSARITGFLVSSGTSGGAKMPWNNKYLDNLTFLYVLRVH                          |                 | At2g23170       |
| 27  | LEDLTSNKKSTQDNLEELITPNKTEYLORFLIDRFKELFKKNVPLVSYEDIKPYLRVNGVSDVTSARITGFLVSSGTSGGAKMPWNNKYLDNLTFLYVLRVH                          |                 | At1g59500       |
| 26  | LEDLTSNKKSTQDNLEELITPNKTEYLORFLIDRFKELFKKNVPLVSYEDIKPYLRVNGVSDVTSARITGFLVSSGTSGGAKMPWNNKYLDNLTFLYVLRVH                          |                 | At2g14960       |
| 17  | FDELRNADQVQKQTELEELITPNKTEYLORFLIDRFKELFKKNVPLVSYEDIKPYLRVNGVSDVTSARITGFLVSSGTSGGAKMPWNNKYLDNLTFLYVLRVH                         |                 | At2g46370. JAR1 |
| 15  | FHVSENAKQDNLEELITPNKTEYLORFLIDRFKELFKKNVPLVSYEDIKPYLRVNGVSDVTSARITGFLVSSGTSGGAKMPWNNKYLDNLTFLYVLRVH                             |                 | At4g03400. DFL2 |
| 127 | ITKLVKGVVEEGKGMVFLFKKESMTPSGLPARVATSYFKSDVFKNRPSSWYVYTSYSPDEVILCFNNTSLYGLLCLGLORDEVIRIGSIFASVMVRAIVELKNSWELCSITREG              |                 | At5g13320. P5B3 |
| 130 | ITSNVKKGVVEEGKGMVFLFKKESMTPSGLPARVATSYFKSDVFKNRPSSWYVYTSYSPDEVILCFNNTSLYGLLCLGLORDEVIRIGSIFASVMVRAIVELKNSWELCSITREG             |                 | At1g23160       |
| 128 | ITKLVKGVVEEGKGMVFLFKKESMTPSGLPARVATSYFKSDVFKNRPSSWYVYTSYSPDEVILCFNNTSLYGLLCLGLORDEVIRIGSIFASVMVRAIVELKNSWELCSITREG              |                 | At5g51470       |
| 123 | ITKLVKGVVEEGKGMVFLFKKESMTPSGLPARVATSYFKSDVFKNRPSSWYVYTSYSPDEVILCFNNTSLYGLLCLGLORDEVIRIGSIFASVMVRAIVELKNSWELCSITREG              |                 | At1g48670       |
| 122 | ITSN--DKVDEKGMVFLFKKESMTPSGLPARVATSYFKSDVFKNRPSSWYVYTSYSPDEVILCFNNTSLYGLLCLGLORDEVIRIGSIFASVMVRAIVELKNSWELCSITREG               |                 | At1g48660       |
| 122 | LYKYLIEF--IREF--SFMVYVRES--EITSGLLRTIMICVLKSVTPAN--SFLDOSQISPHALTCID--TOSMYCOLLCCGLLORDVARI--GAPFASFFL--IKFLFDHWP--ELCS--ITRG   |                 | At5g13360       |
| 129 | LYKYLIEF--IREF--SFMVYVRES--EITSGLLRTIMICVLKSVTPAN--SFLDOSQISPHALTCID--TOSMYCOLLCCGLLORDVARI--GAPFASFFL--IKFLFDHWP--ELCS--ITRG   |                 | At5g13370       |
| 129 | LYKYLIEF--IREF--SFMVYVRES--EITSGLLRTIMICVLKSVTPAN--SFLDOSQISPHALTCID--TOSMYCOLLCCGLLORDVARI--GAPFASFFL--IKFLFDHWP--ELCS--ITRG   | At5g13350       |                 |
| 159 | VFRVYDGL--ITGKGMVFLFKKESMTPSGLPARVATSYFKSDVFKNRPSSWYVYTSYSPDEVILCFNNTSLYGLLCLGLORDEVIRIGSIFASVMVRAIVELKNSWELCSITREG             | At5g13380       |                 |
| 131 | WNVYDGL--ITGKGMVFLFKKESMTPSGLPARVATSYFKSDVFKNRPSSWYVYTSYSPDEVILCFNNTSLYGLLCLGLORDEVIRIGSIFASVMVRAIVELKNSWELCSITREG              | At1g28130       |                 |
| 141 | MOGVYDGL--ITGKGMVFLFKKESMTPSGLPARVATSYFKSDVFKNRPSSWYVYTSYSPDEVILCFNNTSLYGLLCLGLORDEVIRIGSIFASVMVRAIVELKNSWELCSITREG             | At5g54510. DFL1 |                 |
| 141 | MOGVYDGL--ITGKGMVFLFKKESMTPSGLPARVATSYFKSDVFKNRPSSWYVYTSYSPDEVILCFNNTSLYGLLCLGLORDEVIRIGSIFASVMVRAIVELKNSWELCSITREG             | At4g27260       |                 |
| 140 | MOGVYDGL--ITGKGMVFLFKKESMTPSGLPARVATSYFKSDVFKNRPSSWYVYTSYSPDEVILCFNNTSLYGLLCLGLORDEVIRIGSIFASVMVRAIVELKNSWELCSITREG             | At4g37390. YDK1 |                 |
| 127 | WNVYDGL--ITGKGMVFLFKKESMTPSGLPARVATSYFKSDVFKNRPSSWYVYTSYSPDEVILCFNNTSLYGLLCLGLORDEVIRIGSIFASVMVRAIVELKNSWELCSITREG              | At2g47750       |                 |
| 139 | MOGVYDGL--ITGKGMVFLFKKESMTPSGLPARVATSYFKSDVFKNRPSSWYVYTSYSPDEVILCFNNTSLYGLLCLGLORDEVIRIGSIFASVMVRAIVELKNSWELCSITREG             | At1g59500       |                 |
| 139 | MOGVYDGL--ITGKGMVFLFKKESMTPSGLPARVATSYFKSDVFKNRPSSWYVYTSYSPDEVILCFNNTSLYGLLCLGLORDEVIRIGSIFASVMVRAIVELKNSWELCSITREG             | At2g14960       |                 |
| 132 | RNRD--FPIED--GKALC--EYSSQKYSTG--EIVGATATINVRNPKFKGMSKTS--PSCSDEPVEITSDV--GALYGLLCLGLORDEVIRIGSIFASVMVRAIVELKNSWELCSITREG        | At2g46370. JAR1 |                 |
| 135 | RSRF--VYIREG--EITG--EYSSQKYSTG--EIVGATATINVRNPKFKGMSKTS--PSCSDEPVEITSDV--GALYGLLCLGLORDEVIRIGSIFASVMVRAIVELKNSWELCSITREG        | At4g03400. DFL2 |                 |
| 246 | SNWITDLCGROVSLVGGPPELADTEQIQKCG--NKGITLRLWPKAKYIEIVTGSMAQYIPLFYFN--LPLVSTVYGSSETFG--NLPLCKPFDVSYTFM--PNVSYFEFF                  | At5g13320. P5B3 |                 |
| 249 | SNWITDLCGROVSLVGGPPELADTEQIQKCG--NKGITLRLWPKAKYIEIVTGSMAQYIPLFYFN--LPLVSTVYGSSETFG--NLPLCKPFDVSYTFM--PNVSYFEFF                  | At1g23160       |                 |
| 247 | SNWITDLCGROVSLVGGPPELADTEQIQKCG--NKGITLRLWPKAKYIEIVTGSMAQYIPLFYFN--LPLVSTVYGSSETFG--NLPLCKPFDVSYTFM--PNVSYFEFF                  | At5g51470       |                 |
| 192 | SNWITDLCGROVSLVGGPPELADTEQIQKCG--NKGITLRLWPKAKYIEIVTGSMAQYIPLFYFN--LPLVSTVYGSSETFG--NLPLCKPFDVSYTFM--PNVSYFEFF                  | At1g48670       |                 |
| 246 | SNWITDLCGROVSLVGGPPELADTEQIQKCG--NKGITLRLWPKAKYIEIVTGSMAQYIPLFYFN--LPLVSTVYGSSETFG--NLPLCKPFDVSYTFM--PNVSYFEFF                  | At1g48660       |                 |
| 247 | SNWITDLCGROVSLVGGPPELADTEQIQKCG--NKGITLRLWPKAKYIEIVTGSMAQYIPLFYFN--LPLVSTVYGSSETFG--NLPLCKPFDVSYTFM--PNVSYFEFF                  | At5g13360       |                 |
| 247 | SNWITDLCGROVSLVGGPPELADTEQIQKCG--NKGITLRLWPKAKYIEIVTGSMAQYIPLFYFN--LPLVSTVYGSSETFG--NLPLCKPFDVSYTFM--PNVSYFEFF                  | At5g13370       |                 |
| 247 | SNWITDLCGROVSLVGGPPELADTEQIQKCG--NKGITLRLWPKAKYIEIVTGSMAQYIPLFYFN--LPLVSTVYGSSETFG--NLPLCKPFDVSYTFM--PNVSYFEFF                  | At5g13350       |                 |
| 277 | SNWITDLCGROVSLVGGPPELADTEQIQKCG--NKGITLRLWPKAKYIEIVTGSMAQYIPLFYFN--LPLVSTVYGSSETFG--NLPLCKPFDVSYTFM--PNVSYFEFF                  | At5g13380       |                 |
| 250 | SNWITDLCGROVSLVGGPPELADTEQIQKCG--NKGITLRLWPKAKYIEIVTGSMAQYIPLFYFN--LPLVSTVYGSSETFG--NLPLCKPFDVSYTFM--PNVSYFEFF                  | At1g28130       |                 |
| 260 | SSRITDPSVRGAVKTLKPKLADPTEQIQKCG--NKGITLRLWPKAKYIEIVTGSMAQYIPLFYFN--LPLVSTVYGSSETFG--NLPLCKPFDVSYTFM--PNVSYFEFF                  | At5g54510. DFL1 |                 |
| 260 | SSRITDPSVRGAVKTLKPKLADPTEQIQKCG--NKGITLRLWPKAKYIEIVTGSMAQYIPLFYFN--LPLVSTVYGSSETFG--NLPLCKPFDVSYTFM--PNVSYFEFF                  | At4g27260       |                 |
| 259 | SSRITDPSVRGAVKTLKPKLADPTEQIQKCG--NKGITLRLWPKAKYIEIVTGSMAQYIPLFYFN--LPLVSTVYGSSETFG--NLPLCKPFDVSYTFM--PNVSYFEFF                  | At4g37390. YDK1 |                 |
| 246 | SNWITDLCGROVSLVGGPPELADTEQIQKCG--NKGITLRLWPKAKYIEIVTGSMAQYIPLFYFN--LPLVSTVYGSSETFG--NLPLCKPFDVSYTFM--PNVSYFEFF                  | At2g47750       |                 |
| 258 | SSRITDPSVRGAVKTLKPKLADPTEQIQKCG--NKGITLRLWPKAKYIEIVTGSMAQYIPLFYFN--LPLVSTVYGSSETFG--NLPLCKPFDVSYTFM--PNVSYFEFF                  | At2g23170       |                 |
| 257 | SSRITDPSVRGAVKTLKPKLADPTEQIQKCG--NKGITLRLWPKAKYIEIVTGSMAQYIPLFYFN--LPLVSTVYGSSETFG--NLPLCKPFDVSYTFM--PNVSYFEFF                  | At1g59500       |                 |
| 258 | SSRITDPSVRGAVKTLKPKLADPTEQIQKCG--NKGITLRLWPKAKYIEIVTGSMAQYIPLFYFN--LPLVSTVYGSSETFG--NLPLCKPFDVSYTFM--PNVSYFEFF                  | At2g14960       |                 |
| 251 | SSRITDPSVRGAVKTLKPKLADPTEQIQKCG--NKGITLRLWPKAKYIEIVTGSMAQYIPLFYFN--LPLVSTVYGSSETFG--NLPLCKPFDVSYTFM--PNVSYFEFF                  | At2g46370. JAR1 |                 |
| 254 | SSRITDPSVRGAVKTLKPKLADPTEQIQKCG--NKGITLRLWPKAKYIEIVTGSMAQYIPLFYFN--LPLVSTVYGSSETFG--NLPLCKPFDVSYTFM--PNVSYFEFF                  | At4g03400. DFL2 |                 |
| 361 | VG--GG--DK--NVDVLDVVKLGGYEVVPTV--FAGLYRVRGDIIVTGFYNNAPQRFVRR--NVVLSIDSDKTI--EEDI--FKAVS--CAL--L--VLESS--LMLD--LFTSY             | At5g13320. P5B3 |                 |
| 365 | VD--G--DK--NVDVLDVVKLGGYEVVPTV--FAGLYRVRGDIIVTGFYNNAPQRFVRR--NVVLSIDSDKTI--EEDI--FKAVS--CAL--L--VLESS--LMLD--LFTSY              | At1g23160       |                 |
| 362 | VD--G--DK--NVDVLDVVKLGGYEVVPTV--FAGLYRVRGDIIVTGFYNNAPQRFVRR--NVVLSIDSDKTI--EEDI--FKAVS--CAL--L--VLESS--LMLD--LFTSY              | At5g51470       |                 |
| 303 | VDKH--G--DM--ASVLDVVKLGGYEVVPTV--FAGLYRVRGDIIVTGFYNNAPQRFVRR--NVVLSIDSDKTI--EEDI--FKAVS--CAL--L--VLESS--LMLD--LFTSY             | At1g48670       |                 |
| 355 | ITHEE--DM--NVDVLDVVKLGGYEVVPTV--FAGLYRVRGDIIVTGFYNNAPQRFVRR--NVVLSIDSDKTI--EEDI--FKAVS--CAL--L--VLESS--LMLD--LFTSY              | At1g48660       |                 |
| 362 | VYK--EY--SGHDP--FVVDVLDVVKLGGYEVVPTV--FAGLYRVRGDIIVTGFYNNAPQRFVRR--NVVLSIDSDKTI--EEDI--FKAVS--CAL--L--VLESS--LMLD--LFTSY        | At1g48660       |                 |
| 362 | VYK--EY--SGHDP--FVVDVLDVVKLGGYEVVPTV--FAGLYRVRGDIIVTGFYNNAPQRFVRR--NVVLSIDSDKTI--EEDI--FKAVS--CAL--L--VLESS--LMLD--LFTSY        | At5g13370       |                 |
| 362 | VYK--EY--SGHDP--FVVDVLDVVKLGGYEVVPTV--FAGLYRVRGDIIVTGFYNNAPQRFVRR--NVVLSIDSDKTI--EEDI--FKAVS--CAL--L--VLESS--LMLD--LFTSY        | At5g13350       |                 |
| 392 | VYK--EY--SGHDP--FVVDVLDVVKLGGYEVVPTV--FAGLYRVRGDIIVTGFYNNAPQRFVRR--NVVLSIDSDKTI--EEDI--FKAVS--CAL--L--VLESS--LMLD--LFTSY        | At5g13380       |                 |
| 365 | VYK--EY--SGHDP--FVVDVLDVVKLGGYEVVPTV--FAGLYRVRGDIIVTGFYNNAPQRFVRR--NVVLSIDSDKTI--EEDI--FKAVS--CAL--L--VLESS--LMLD--LFTSY        | At1g28130       |                 |
| 374 | VHNSGV--TSSISLPAKTEKEOQELVDVVDVVKLGGYEVVPTV--FAGLYRVRGDIIVTGFYNNAPQRFVRR--NVVLSIDSDKTI--EEDI--FKAVS--CAL--L--VLESS--LMLD--LFTSY | At5g54510. DFL1 |                 |
| 374 | VHNSGV--TSSISLPAKTEKEOQELVDVVDVVKLGGYEVVPTV--FAGLYRVRGDIIVTGFYNNAPQRFVRR--NVVLSIDSDKTI--EEDI--FKAVS--CAL--L--VLESS--LMLD--LFTSY | At4g27260       |                 |
| 374 | VHNSGV--TSSISLPAKTEKEOQELVDVVDVVKLGGYEVVPTV--FAGLYRVRGDIIVTGFYNNAPQRFVRR--NVVLSIDSDKTI--EEDI--FKAVS--CAL--L--VLESS--LMLD--LFTSY | At4g37390. YDK1 |                 |
| 362 | VYK--EY--SGHDP--FVVDVLDVVKLGGYEVVPTV--FAGLYRVRGDIIVTGFYNNAPQRFVRR--NVVLSIDSDKTI--EEDI--FKAVS--CAL--L--VLESS--LMLD--LFTSY        | At2g47750       |                 |
| 374 | VHNSGV--TSSISLPAKTEKEOQELVDVVDVVKLGGYEVVPTV--FAGLYRVRGDIIVTGFYNNAPQRFVRR--NVVLSIDSDKTI--EEDI--FKAVS--CAL--L--VLESS--LMLD--LFTSY | At2g23170       |                 |
| 372 | LGG--VEA--ISVLDVLDVVKLGGYEVVPTV--FAGLYRVRGDIIVTGFYNNAPQRFVRR--NVVLSIDSDKTI--EEDI--FKAVS--CAL--L--VLESS--LMLD--LFTSY             | At1g59500       |                 |
| 362 | VYK--EY--SGHDP--FVVDVLDVVKLGGYEVVPTV--FAGLYRVRGDIIVTGFYNNAPQRFVRR--NVVLSIDSDKTI--EEDI--FKAVS--CAL--L--VLESS--LMLD--LFTSY        | At2g14960       |                 |
| 376 | VYRREQS--DIC--IGDVFDEPKVPSVQVKGLEYELVTT--FAGLYRVRGDIIVTGFYNNAPQRFVRR--NVVLSIDSDKTI--EEDI--FKAVS--CAL--L--VLESS--LMLD--LFTSY     | At2g46370. JAR1 |                 |
| 372 | LGG--VEA--ISVLDVLDVVKLGGYEVVPTV--FAGLYRVRGDIIVTGFYNNAPQRFVRR--NVVLSIDSDKTI--EEDI--FKAVS--CAL--L--VLESS--LMLD--LFTSY             | At4g03400. DFL2 |                 |
| 459 | ADTSIPGGHYVWELKAKYRND--IV--DKVLECCYVVEESLNVYVRSYKGGIIEIRVVOGTDFALREFFITGASIS--QYKTF--LCK--S--EAL--LEEN--HACFF                   | At5g13320. P5B3 |                 |
| 460 | ADTSIPGGHYVWELKAKYRND--IV--DKVLECCYVVEESLNVYVRSYKGGIIEIRVVOGTDFALREFFITGASIS--QYKTF--LCK--S--EAL--LEEN--HACFF                   | At1g23160       |                 |
| 406 | ADTSIPGGHYVWELKAKYRND--IV--DKVLECCYVVEESLNVYVRSYKGGIIEIRVVOGTDFALREFFITGASIS--QYKTF--LCK--S--EAL--LEEN--HACFF                   | At5g51470       |                 |
| 454 | ADTSIPGGHYVWELKAKYRND--IV--DKVLECCYVVEESLNVYVRSYKGGIIEIRVVOGTDFALREFFITGASIS--QYKTF--LCK--S--EAL--LEEN--HACFF                   | At1g48670       |                 |
| 468 | ADTSIPGGHYVWELKAKYRND--IV--DKVLECCYVVEESLNVYVRSYKGGIIEIRVVOGTDFALREFFITGASIS--QYKTF--LCK--S--EAL--LEEN--HACFF                   | At1g48660       |                 |
| 468 | ADTSIPGGHYVWELKAKYRND--IV--DKVLECCYVVEESLNVYVRSYKGGIIEIRVVOGTDFALREFFITGASIS--QYKTF--LCK--S--EAL--LEEN--HACFF                   | At5g13360       |                 |
| 468 | ADTSIPGGHYVWELKAKYRND--IV--DKVLECCYVVEESLNVYVRSYKGGIIEIRVVOGTDFALREFFITGASIS--QYKTF--LCK--S--EAL--LEEN--HACFF                   | At5g13370       |                 |
| 469 | ADTSIPGGHYVWELKAKYRND--IV--DKVLECCYVVEESLNVYVRSYKGGIIEIRVVOGTDFALREFFITGASIS--QYKTF--LCK--S--EAL--LEEN--HACFF                   | At5g13350       |                 |
| 498 | ADTSIPGGHYVWELKAKYRND--IV--DKVLECCYVVEESLNVYVRSYKGGIIEIRVVOGTDFALREFFITGASIS--QYKTF--LCK--S--EAL--LEEN--HACFF                   | At5g13380       |                 |
| 485 | ADTSIPGGHYVWELKAKYRND--IV--DKVLECCYVVEESLNVYVRSYKGGIIEIRVVOGTDFALREFFITGASIS--QYKTF--LCK--S--EAL--LEEN--HACFF                   | At1g28130       |                 |
| 488 | ADTSIPGGHYVWELKAKYRND--IV--DKVLECCYVVEESLNVYVRSYKGGIIEIRVVOGTDFALREFFITGASIS--QYKTF--LCK--S--EAL--LEEN--HACFF                   | At5g54510. DFL1 |                 |
| 488 | ADTSIPGGHYVWELKAKYRND--IV--DKVLECCYVVEESLNVYVRSYKGGIIEIRVVOGTDFALREFFITGASIS--QYKTF--LCK--S--EAL--LEEN--HACFF                   | At4g27260       |                 |
| 481 | ADTSIPGGHYVWELKAKYRND--IV--DKVLECCYVVEESLNVYVRSYKGGIIEIRVVOGTDFALREFFITGASIS--QYKTF--LCK--S--EAL--LEEN--HACFF                   | At4g37390. YDK1 |                 |
| 472 | ADTSIPGGHYVWELKAKYRND--IV--DKVLECCYVVEESLNVYVRSYKGGIIEIRVVOGTDFALREFFITGASIS--QYKTF--LCK--S--EAL--LEEN--HACFF                   | At2g47750       |                 |
| 475 | ADTSIPGGHYVWELKAKYRND--IV--DKVLECCYVVEESLNVYVRSYKGGIIEIRVVOGTDFALREFFITGASIS--QYKTF--LCK--S--EAL--LEEN--HACFF                   | At2g23170       |                 |
| 474 | ADTSIPGGHYVWELKAKYRND--IV--DKVLECCYVVEESLNVYVRSYKGGIIEIRVVOGTDFALREFFITGASIS--QYKTF--LCK--S--EAL--LEEN--HACFF                   | At1g59500       |                 |
| 468 | ADTSIPGGHYVWELKAKYRND--IV--DKVLECCYVVEESLNVYVRSYKGGIIEIRVVOGTDFALREFFITGASIS--QYKTF--LCK--S--EAL--LEEN--HACFF                   | At2g14960       |                 |
| 462 | ADTSIPGGHYVWELKAKYRND--IV--DKVLECCYVVEESLNVYVRSYKGGIIEIRVVOGTDFALREFFITGASIS--QYKTF--LCK--S--EAL--LEEN--HACFF                   | At2g46370. JAR1 |                 |
| 483 | ADTSIPGGHYVWELKAKYRND--IV--DKVLECCYVVEESLNVYVRSYKGGIIEIRVVOGTDFALREFFITGASIS--QYKTF--LCK--S--EAL--LEEN--HACFF                   | At4g03400. DFL2 |                 |
